# Supplementary material for: Muscle strength and inflammatory response to the training load in rowers
Source: PeerJ. 2020 Dec 16;8:e10355. doi: 10.7717/peerj.10355 (PMC7749653; doi:10.7717/peerj.10355)
Supplement: Supplemental Information 1 [file peerj-08-10355-s001.xlsx]

## Sheet: raw data
No.	Subjects	Age [yrs]	Body height [m]	Body mass_1 [kg]	Body mass_2 [kg]	Fat mass_1 [kg]	Fat mass_2 [kg]	Fat mass_1 [%]	Fat mass_2 [%]	Fat free mass_1 [kg]	Fat free mass_2 [kg]	hsCRP [mg/L] _1	hsCRP [mg/L] _2	IL-6 [ng\ml] _1	IL-6 [ng\ml] _2	Insulin [µIU/ml] _1	Insulin [µIU/ml] _2	Glucose 1 (mg/dL)	Glucose 2 (mg/dL)	Glucose 1 (mmol/L)	Glucose 2 (mmol/L)	QUICKY-1	QUICKY-2	HOMA-1	HOMA-2	Cortisol_1	Cortisol_2	TT_1	TT_2	FT_1	FT_2	TT/C_1	TT/C_2	FT/C_1	FT/C_2	CK_1	CK_2	FRAP_1	FRAP_2	Total phenolics_1	Total phenolics_2	TBARS_1	TBARS_2	Global strength of lower limb extensors, left_1	Global strength of lower limb extensors, left_2	Global strength of lower limb extensors, right_1	Global strength of lower limb extensors, right_2	Torques - torso, extensors_1	Torques - torso, extensors_2
1	3	20	1.93	96.1	92.7	10	10.9	10.4	11.8	86.1	81.8	0.102	0.036	0.101	0.109	7.863	10.63	100	94	5.55556	5.22222	0.345353	0.333371	1.94148	2.46721	268.47	393.498	6.707	6.207	21.85	19.104	0.0249823	0.0157739	0.0813871	0.0485492	751.1	182.4	907.549	831.118	2.418	2.69	4.035	4.275	30.6	23.9	32	26.5	8.13	7.31392
2	5	25	1.94	89.8	90.5	10.1	11	11.2	12.2	79.7	79.5	0.06	0.081	0.071	0.066	10.85	8.01	98	100	5.44444	5.55556	0.330398	0.344396	2.62543	1.97778	191.622	219.125	8.674	8.845	26.795	29.273	0.0452662	0.0403651	0.139833	0.13359	262	275.8	755.578	959.391	2.381	2.672	4.937	3.363	23.5	25.7	23.2	25.9	5.96604	7.07072
3	7	34	1.91	101.5	100.4	19.4	17	19.1	16.9	82.1	83.4	0.141	0.067	0.055	0.059	8.83	7.34	105	104	5.83333	5.77778	0.337024	0.346893	2.28926	1.88484	253.379	232.143	5.982	5.165	18.134	15.018	0.0236089	0.0222492	0.0715687	0.0646929	209.7	207.8	898.417	776.508	2.569	2.589	3.958	4.525	35.1	28.5	42.1	33.7	6.25005	5.68725
4	8	32	1.94	98	98.4	9.2	4.6	9.4	4.7	88.8	93.8	0.219	0.024	0.127	0.159	10.78	9.36	98	100	5.44444	5.55556	0.330705	0.336556	2.60849	2.31111	263.868	305.961	5.029	4.215	15.188	13.326	0.0190588	0.0137763	0.0575591	0.0435546	113.9	121.4	828.462	552.743	2.411	2.255	3.191	2.759	24.5	29.4	26.7	30.2	7.92806	9.2378
5	9	19	2.03	98	95.7	16.4	10.9	16.7	11.4	81.6	84.8	0.152	0.141	0.074	0.097	11.23	8.98	91	94	5.05556	5.22222	0.33229	0.341716	2.52328	2.08425	249.079	331.825	5.4	6.298	16.769	22.33	0.0216799	0.0189799	0.067324	0.0672945	376.2	127	914.736	882.926	2.496	2.62	6.694	4.448	31.6	36.1	34.8	29.7	10.3906	9.83281
6	10	18	1.85	81.6	82.3	13.1	12.8	16	15.6	68.5	69.5	0.147	0.072	0.065	0.068	9.96	10.63	95	98	5.27778	5.44444	0.336023	0.331372	2.3363	2.5722	294.842	312.653	5.301	4.461	15.687	14.506	0.0179791	0.0142682	0.0532048	0.0463965	280.1	111.5	771.074	743.801	2.725	2.86	3.661	4.035	39.9	32.9	40.8	32.8	8.04681	8.99149
7	11	18	1.82	78	79.8	14	13.8	17.9	17.3	64	66	0.22	0.253	0.072	0.069	16.39	10.7	97	93	5.38889	5.16667	0.312368	0.333571	3.92551	2.45704	909.77	428.692	4.72	4.746	13.027	15.552	0.00518812	0.0110709	0.014319	0.0362778	95.5	181.4	938.316	880.078	2.682	2.954	2.739	3.67	29.6	28.5	28.3	28.3	6.90897	6.79198
8	12	21	1.93	92.1	92	10.5	11.5	11.4	12.5	81.6	80.5	0.246	0.069	0.071	0.119	9.81	12.42	105	96	5.83333	5.33333	0.331911	0.325056	2.54333	2.944	252.384	245.061	5.726	4.447	17.947	15.844	0.0226877	0.0181465	0.0711099	0.0646533	479.9	226.8	772.528	721.639	2.514	2.623	5.168	3.066	28.8	25.5	30.4	25.9	4.97068	6.01522
9	17	23	1.89	86.5	88.9	10.9	11.4	12.6	12.8	75.6	77.5	0.117	0.098	0.095	0.097	15.04	10.85	86	75	4.77778	4.16667	0.321363	0.343585	3.19368	2.00926	133.196	143.763	4.969	4.249	13.177	11.843	0.0373059	0.0295556	0.0989294	0.0823786	205.3	154.9	656.912	634.776	2.491	2.555	3.642	3.507	25.5	22.2	25	22.5	8.36405	6.81665
10	18	20	1.89	89.4	93.1	9.7	10.8	10.9	11.6	79.7	82.3	0.181	0.247	0.069	0.067	8.31	9.13	88	83	4.88889	4.61111	0.349152	0.347277	1.80563	1.87109	403.404	229.621	7.33	6.618	18.768	20.104	0.0181704	0.0288214	0.0465241	0.087553	445.1	340.6	670.836	879.656	2.463	2.441	3.93	3.382	43	36.7	30.8	25.2	6.81801	7.1536
11	21	20	1.91	89.4	90.8	8.6	7.5	9.6	8.2	80.8	83.4	0.214	0.3	0.258	0.245	9.43	8.83	87	93	4.83333	5.16667	0.343167	0.343119	2.0257	2.02763	653.807	435.537	4.142	5.322	8.533	14.773	0.0063352	0.0122194	0.0130513	0.033919	1012.4	208.1	954.881	938.591	2.628	2.635	4.016	3.872	40.3	37.4	35.1	28.3	6.17736	7.36271
12	22	20	1.88	85.7	85.5	8.7	9.1	10.1	10.6	77	76.4	0.181	0.2	0.066	0.063	7.34	7.34	97	85	5.38889	4.72222	0.350574	0.357767	1.75798	1.54049	225.989	221.403	5.537	5.175	15.746	15.964	0.0245012	0.0233737	0.069676	0.0721038	480.5	695.9	700.838	871.971	2.446	2.537	5.197	5.696	25.4	25.1	32	31.4	7.4764	6.79515
13	23	21	1.95	88.5	90.7	10	10.7	11.3	11.8	78.5	80	0.271	0.224	0.121	0.127	9.73	16.39	90	102	5	5.66667	0.339864	0.310253	2.16222	4.12785	167.777	195.144	6.168	4.633	15.884	10.91	0.0367631	0.0237414	0.0946733	0.0559074	261	123.3	1165.04	1157.8	2.502	2.624	4.17	4.074	43.5	36.2	34.1	27.1	7.6923	8.02339
14	24	25	2.09	105.1	105.8	10	10.3	9.5	9.7	95.1	95.5	0.178	0.153	0.074	0.07	8.53	7.93	97	91	5.38889	5.05556	0.342733	0.349857	2.04299	1.7818	235.113	270.968	6.305	5.591	13.361	16.849	0.0268169	0.0206334	0.056828	0.0621808	313.1	229.3	762.366	790.308	2.524	2.392	6.06	3.363	27.8	31.9	27.5	33	5.49808	6.64675
15	25	23	2	108.8	106.5	15.6	14.4	14.3	13.5	93.2	92.1	0.151	0.229	0.06	0.063	9.05	9.36	90	103	5	5.72222	0.343537	0.335108	2.01111	2.38044	281.013	274.527	6.29	5.167	16.798	18.935	0.0223833	0.0188215	0.0597766	0.0689732	846	408.2	1001.33	1012.51	2.361	2.496	4.16	5.532	24.5	29.7	25.5	30.3	6.88849	7.57089
16	26	20	1.9	96.4	90.9	13.7	12.6	14.2	13.9	82.7	78.3	0.258	0.21	0.076	0.061	10.93	7.94	103	102	5.72222	5.66667	0.327712	0.343829	2.77973	1.9997	341.765	459.816	4.486	3.911	12.1	12.419	0.013126	0.00850558	0.0354044	0.0270086	172.4	271.7	1120.27	1145.97	2.591	2.606	5.072	6.339	37.1	34.4	34.6	32.9	6.2875	7.59953
17	28	19	1.92	107.2	105.4	22.6	20.2	21.1	19.2	84.6	85.2	0.308	0.251	0.06	0.061	11.68	12.27	108	107	6	5.94444	0.32249	0.320695	3.11467	3.2417	238.636	276.802	4.85	3.509	17.558	12.496	0.0203238	0.0126769	0.0735765	0.0451442	1125.7	658.1	818.227	764.588	2.42	2.54	6.473	3.709	29.7	22.8	28.9	23.3	6.27012	7.69879
[truncated: 6 more columns]
